# Supplementary material for: Pan-cancer analysis reveals the potential of hyaluronate synthase as therapeutic targets in human tumors
Source: PubMed Central journal article supplement (PMC10448108; doi:10.1016/j.heliyon.2023.e19112), 2023-08-12

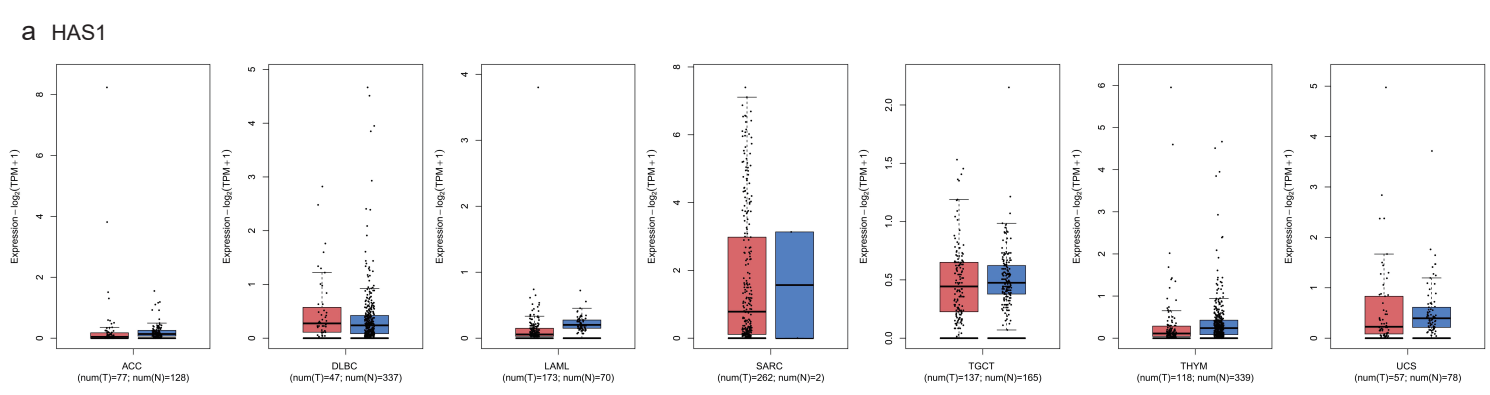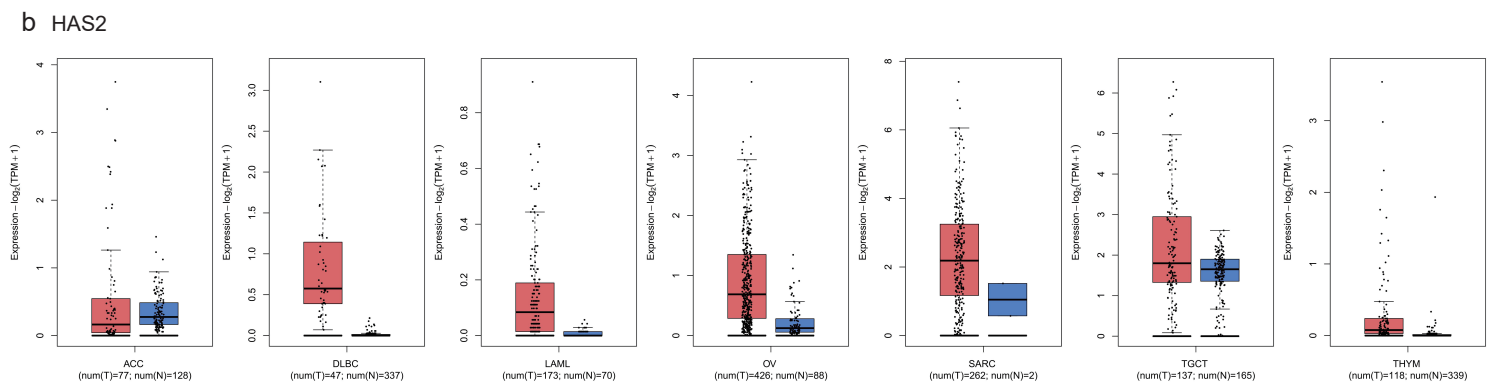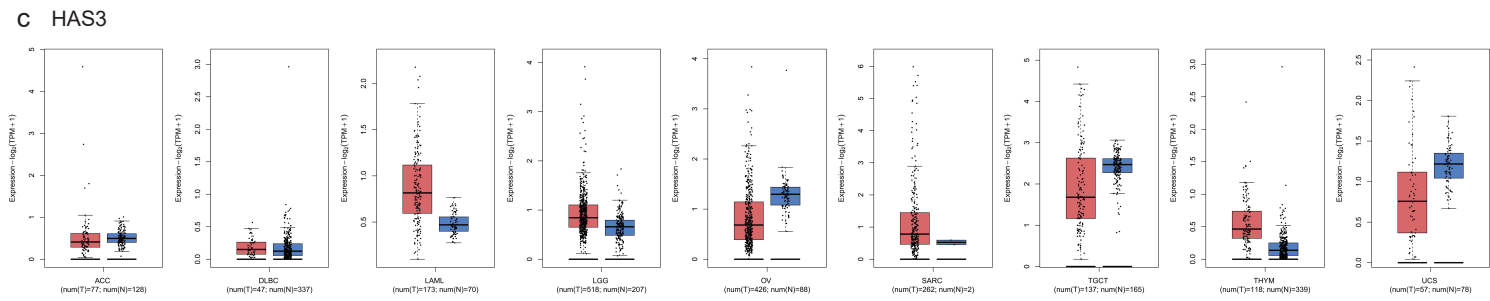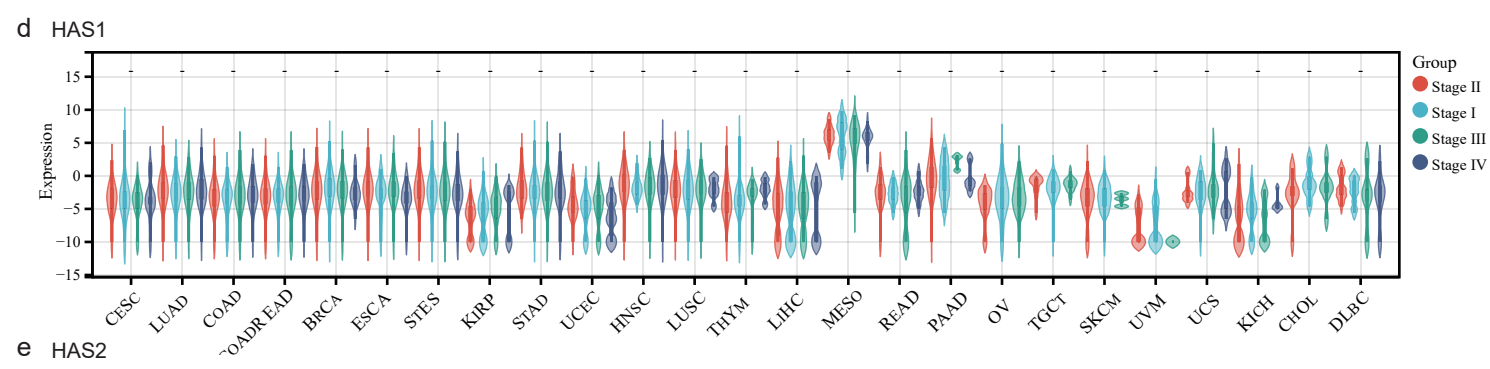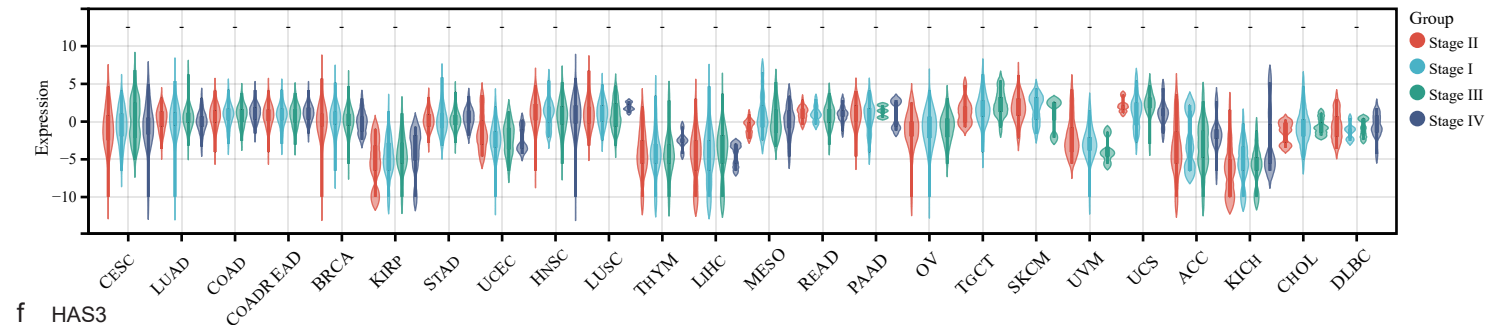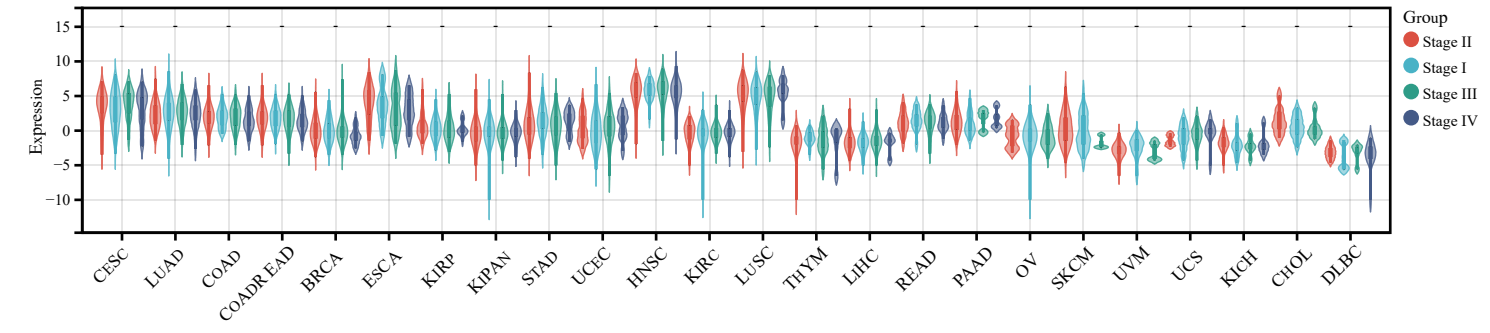

Supplement: mmc4.pdf [file mmc4.pdf]
