# Supplementary material for: Pan-cancer analysis reveals the potential of hyaluronate synthase as therapeutic targets in human tumors
Source: PubMed Central journal article supplement (PMC10448108; doi:10.1016/j.heliyon.2023.e19112), 2023-08-12
Supplement: mmc5.pdf [file mmc5.pdf]

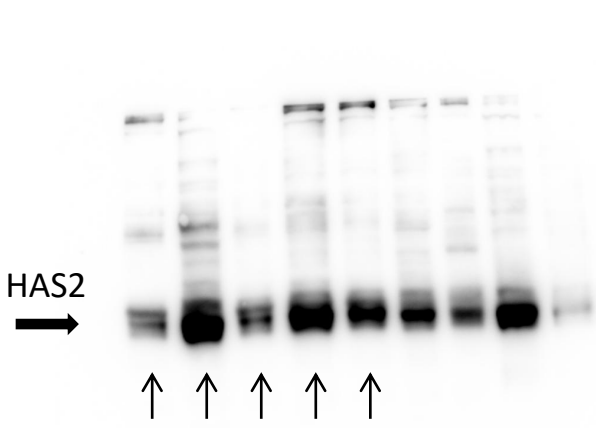

Fig 7a HAS2  
(HA1800/U138/U118/U87/U251)

GAPDH  
→

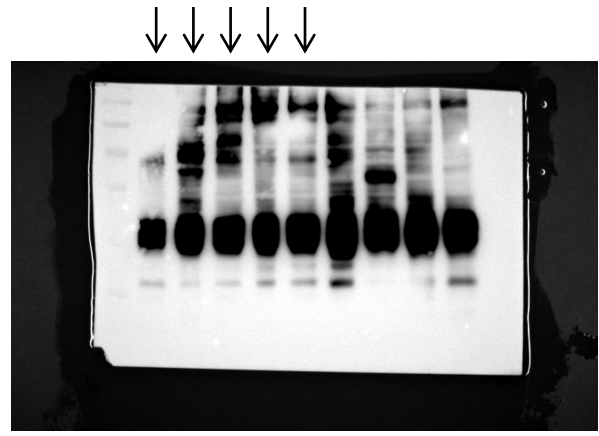

Fig 7a GAPDH  
(HA1800/U138/U118/U87/U251)

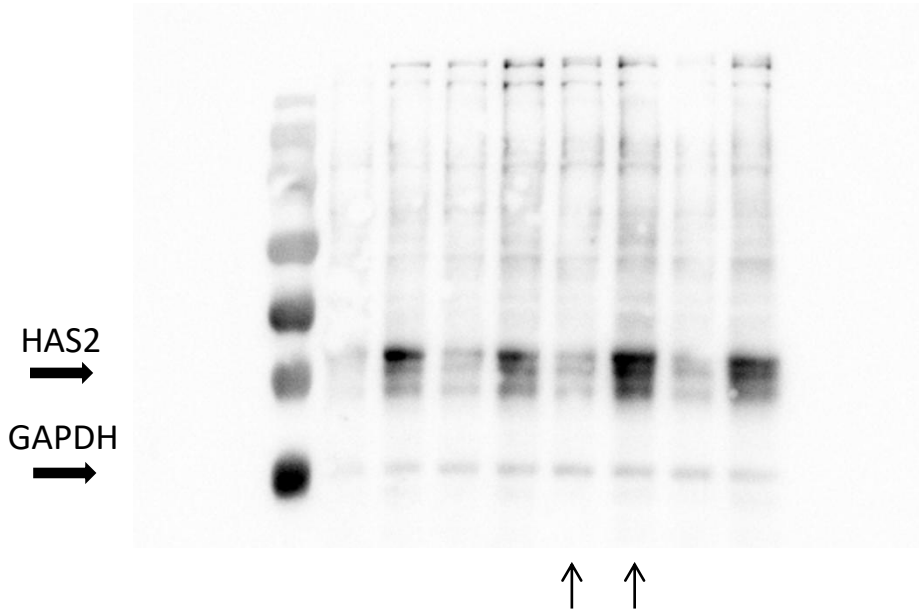

Fig 7b HAS2 GAPDH  
(Con/HAS2-OE)

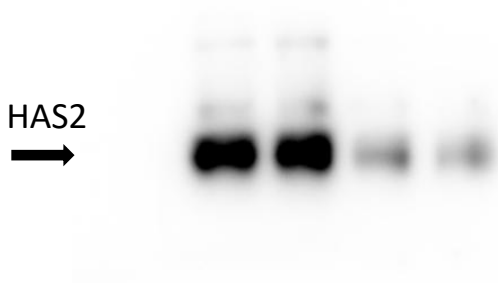

Fig 7c HAS2  
(Con/HAS2-KO1/HAS2-KO2/HAS2-KO3)

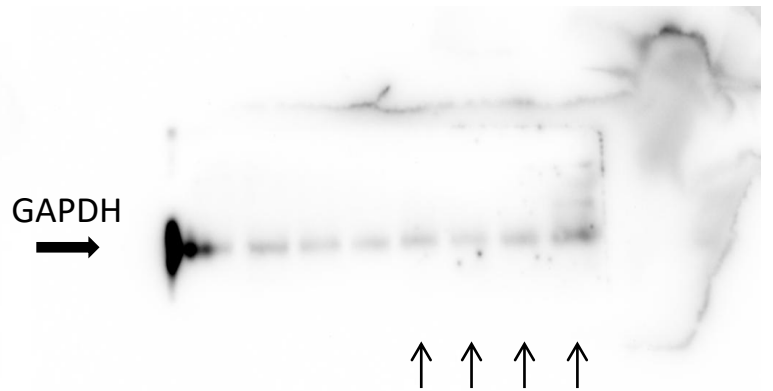

Fig 7c GAPDH  
(Con/HAS2-KO1/HAS2-KO2/HAS2-KO3)
